# Supplementary material
Source: Springer Nature journal article supplement (https://www.springermedizin.de/resource/supplementary/12936_2010_1329_MOESM1_ESM.pdf/9549532)

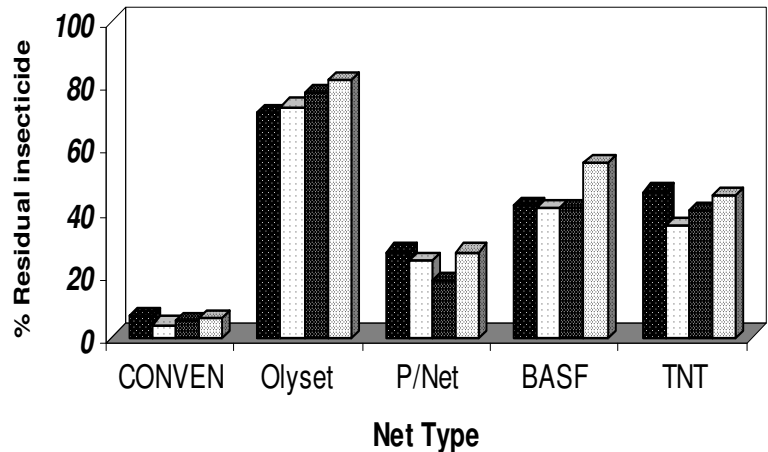

■ Sun/Hang □ Sun/Grnd ■ Shd/Grnd □ Shd/Hang

Supplement: MOESM1 [file 9549532]
